# Supplementary material
Source: publisher figshare collection journal article supplement (https://sage.figshare.com/ndownloader/files/38308131)
Supplement: Supplementary file 1 [file 38308131]

**Supplementary Table 2: Characteristics of All Our Families pregnancy cohort at recruitment (n=3,387) and sample size at each data point**

| **Participant characteristics** | **na (%)** | **% (95% CI)** |
| --- | --- | --- |
| Maternal age (mean and standard deviation): | 3281 | 30.6 (4.6) |
| Parity:  No previous birth  Previous birth to at least one birth | 1635 (49.0)  1703 (51.0) | 47.3, 50.7  49.3, 52.7 |
| Marital status:  Married/common law  Other | 3164 (94.4)  188 (5.6) | 93.6, 95.1  4.9, 6.4 |
| Ethnicity:  Other  White/Caucasian | 716 (21.4)  2636 (78.6) | 20.0, 22.8  77.2, 80.1 |
| Time in Canada (immigration status):  Born in Canada/lived here 5+years  Lived in Canada less than 5 years | 3016 (90.3)  325 (9.4) | 89.2, 91.2  8.8, 10.8 |
| Education:  High school or less  Some or completed post-secondary | 367 (10.9)  2987 (89.1) | 9.9, 12.0  88.0, 90.0 |
| Income:  Less than $60,000  $60,000 or more | 596 (18.3)  2654 (81.7) | 17.0, 19.7  80.3, 82.9 |
| Elevated anxiety and/or depression symptoms during pregnancyb:  No  Yes | 2575 (76.8)  778 (23.2) | 75.3, 78.2  21.8, 24.7 |
| Sample size after childbirth at each data point:  4-months  1-year  2-years  3-years  5-years  8-years | 3057  1573  1595  1994  1991  2074 | - |

*Note:* **a**Sample size between variables differs as missing values were deleted using individual variable wise approach.

b Edinburgh Postnatal Depression Score (EPDS) cut-off ≥10 and/or Speilberger State Anxiety Inventory (SSAI) cut-off ≥40. Maternal age, parity, marital status, ethnicity, immigration status, education, income, and anxiety and/or depression were measured during pregnancy at recruitment.
